# Supplementary material for: Understanding the thermosensitivity of POEGA-based star polymers: LCST-type transition in water vs. UCST-type transition in ethanol
Source: Royal Society of Chemistry journal article supplement (doi:10.1039/c5sm03054d), 2016-01-01
Supplement: c5sm03054d1.pdf [file c5sm03054d1.pdf]

*Supporting Information for*

# Understanding the Thermosensitivity of POEGA- Based Star Polymers: LCST-type Transition in Water *vs.* UCST-type Transition in Ethanol

*Lei Hou,<sup>a</sup> Qijing Chen,<sup>b</sup> Zesheng An<sup>b</sup> and Peiyi Wu<sup>\*a</sup>*

<sup>a</sup>Stat Key Laboratory of Molecular Engineering of Polymers, Collaborative Innovation Center of Polymers and Polymer Composite Materials, Department of Macromolecular Science, and Laboratory of Advanced Materials, Fudan University, Shanghai 200433, China

<sup>b</sup>Institute of Nanochemistry and Nanobiology, College of Environmental Science and Chemical Engineering, Shanghai University, Shanghai 200444, China

---

\*corresponding author, email: [peiyiwu@fudan.edu.cn](mailto:peiyiwu@fudan.edu.cn)

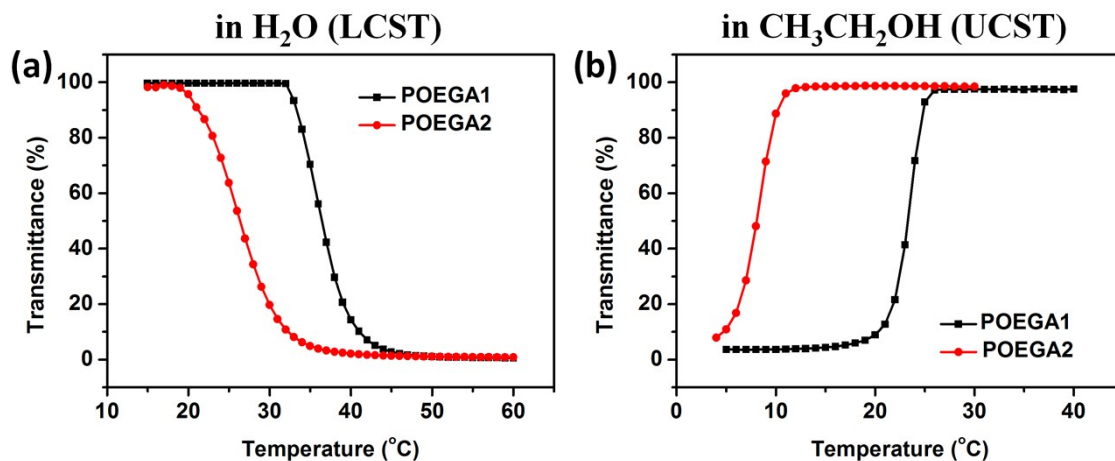

Figure S1. Turbidity curves of linear POEGA1 ( $M_n = 34$  kg/mol,  $M_w/M_n = 1.23$ , determined in DMF) and POEGA2 ( $M_n = 7.6$  kg/mol,  $M_w/M_n = 1.18$ , determined in DMF) in water during heating (a) and in ethanol during cooling (b) at the concentration of 0.1 wt %.

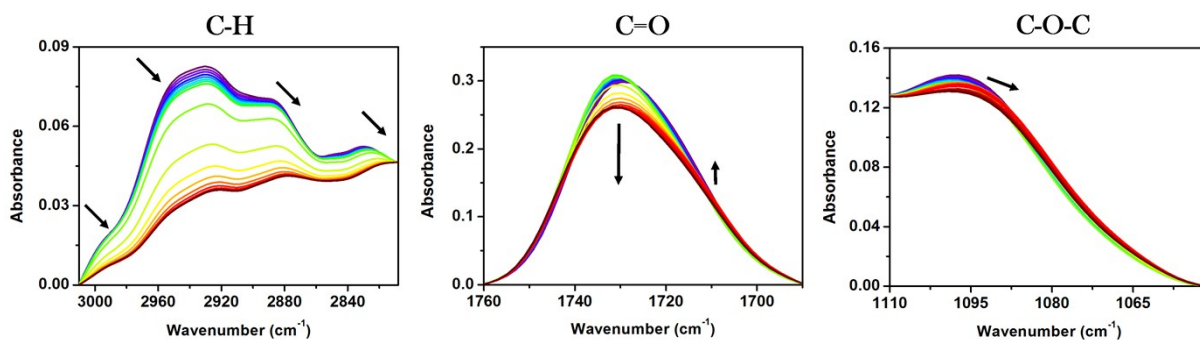

Figure S2. Temperature-dependent FTIR spectra of linear POEGA1 in  $D_2O$  (10 wt %) during heating from 25 to 46 °C with an interval of 1 °C.

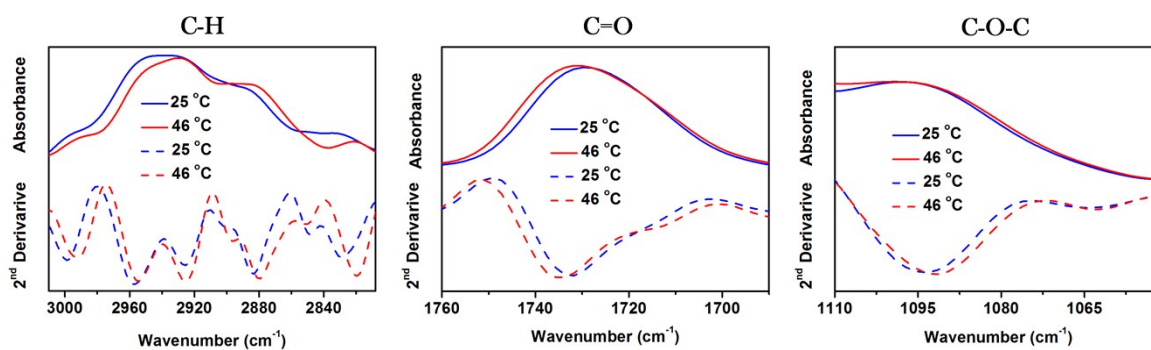

Figure S3. 1D IR (solid line) and second-derivative (dashed line) spectral comparison of linear POEGA1 in  $D_2O$  (10 wt %) at 25 (blue line) and 46 (red line) °C.
